# Supplementary material
Source: PubMed Central journal article supplement (PMC11292404)
Supplement: NIHMS2012723-supplement-Supplement.pdf [file NIHMS2012723-supplement-Supplement.pdf]

## Supplementary Online Content

Kit BK, Carroll MD, Lacher DA, Sorlie PD, DeJesus JM, Ogden CL. Trends in Serum Lipids Among US Youths Aged 6 to 19 Years, 1988-2010. *JAMA*. 2012;308(6):591-600.

**eTable 1.** Sample Sizes for NHANES 1988-1994, 1999-2002, and 2007-2010<sup>a</sup>

**eTable 2:** Prevalence Over Time in Adverse Lipid Concentration by Sex, Age, Race/Ethnicity, Among Children and Adolescents, 6-19 Years, US, 1988-2010

**eTable 3:** Prevalence Over Time in Adverse Lipid Concentration by Sex, Age, Race/Ethnicity, Among Adolescents, 12-19 Years, US, 1988-2010

**eTable 4:** Linear Regression Analyses of Serum Lipid Concentrations With Adjustment for Age, Race/Ethnicity, and Weight Status, US, 6-19 Years, 1988-2010

This supplementary material has been provided by the authors to give readers additional information about their work.

**eTable 1. Sample Sizes for NHANES 1988-1994, 1999-2002, and 2007-2010<sup>a</sup>**

|                                                        | <b>1988-1994</b>         | <b>1999-2002</b>         | <b>2007-2010</b>         |
|--------------------------------------------------------|--------------------------|--------------------------|--------------------------|
|                                                        | n(% total <sup>b</sup> ) | n(% total <sup>b</sup> ) | n(% total <sup>b</sup> ) |
| <b>Sample size, both sexes, 6-19 years<sup>c</sup></b> | 5759 (100)               | 6152 (100)               | 4205 (100)               |
| <b>Sex</b>                                             |                          |                          |                          |
| Male                                                   | 2805 (51.0)              | 3094 (51.7)              | 2196 (51.7)              |
| Female                                                 | 2954 (49.0)              | 3058 (48.3)              | 2009 (48.2)              |
| <b>Age, years</b>                                      |                          |                          |                          |
| 6-8                                                    | 1362 (20.2)              | 910 (20.7)               | 945 (18.8)               |
| 9-11                                                   | 1479 (22.2)              | 945 (20.5)               | 1013 (20.4)              |
| 12-15                                                  | 1492 (28.9)              | 2178 (29.2)              | 1109 (30.3)              |
| 16-19                                                  | 1426 (28.6)              | 2119 (29.6)              | 1138 (30.5)              |
| <b>Race/ethnicity</b>                                  |                          |                          |                          |
| Non-Hispanic White                                     | 1507 (66.7)              | 1553 (59.8)              | 1299 (57.8)              |
| Non-Hispanic Black                                     | 1948 (14.9)              | 1823 (14.5)              | 955 (14.0)               |
| Mexican American                                       | 2031 (8.6)               | 2262 (11.7)              | 1171 (14.4)              |
| Other                                                  | 273 (9.9)                | 514 (14.1)               | 780 (13.8)               |
| <b>Weight Status<sup>d</sup></b>                       |                          |                          |                          |
| Underweight                                            | 186 (3.7)                | 186 (3.7)                | 132 (3.4)                |
| Normal weight                                          | 3893 (71.8)              | 3705 (64.7)              | 2466 (62.5)              |
| Overweight                                             | 792 (13.9)               | 944 (15.3)               | 682 (15.5)               |
| Obese                                                  | 749 (10.5)               | 1155 (16.3)              | 875 (18.6)               |
| <b>Fasting sample size, both sexes, 12-19 years</b>    | 1106 (100)               | 1861 (100)               | 996 (100)                |
| <b>Sex</b>                                             |                          |                          |                          |
| Male                                                   | 491 (49.3)               | 945 (51)                 | 547 (50.9)               |
| Female                                                 | 615 (50.7)               | 916 (49)                 | 449 (49.1)               |
| <b>Age</b>                                             |                          |                          |                          |
| 12-15                                                  | 559 (46.5)               | 924 (49.7)               | 483 (50.3)               |
| 16-19                                                  | 547 (53.5)               | 937 (50.3)               | 513 (49.7)               |
| <b>Race/ethnicity</b>                                  |                          |                          |                          |
| Non-Hispanic White                                     | 277 (64.3)               | 491 (61.8)               | 326 (59.8)               |
| Non-Hispanic Black                                     | 374 (14.8)               | 512 (13.9)               | 216 (15.0)               |
| Mexican American                                       | 401 (8.4)                | 704 (10.7)               | 268 (12.5)               |
| Other                                                  | 54 (12.4)                | 154 (13.6)               | 186 (12.7)               |
| <b>Weight Status<sup>d</sup></b>                       |                          |                          |                          |
| Underweight                                            | 37 (4.1)                 | 57 (4.4)                 | 25 (2.9)                 |
| Normal weight                                          | 700 (70.0)               | 1122 (65.8)              | 593 (63.6)               |
| Overweight                                             | 166 (14.8)               | 281 (13.5)               | 171 (15.6)               |
| Obese                                                  | 161 (11.1)               | 345 (16.3)               | 185 (17.9)               |

Source: National Health and Nutrition Examination Survey

<sup>a</sup> Sample sizes are un-weighted<sup>b</sup> Percentages may not sum to 100% because of rounding<sup>c</sup> Excludes those with missing total cholesterol or high density lipoprotein cholesterol<sup>d</sup> Pregnant adolescents excluded from these analyses

Note: Requirement for fasting was 8.5 to 23 hours

**eTable 2:** Prevalence Over Time in Adverse Lipid Concentration by Sex, Age, Race/Ethnicity, Among Children and Adolescents, 6-19 Years, US, 1988-2010

|                                        | 1988-1994<br>%(95% CI) | 1999-2002<br>%(95% CI) | 2007-2010<br>%(95% CI) | P <sup>a</sup> |
|----------------------------------------|------------------------|------------------------|------------------------|----------------|
| <b>Total cholesterol (≥200 mg/dL)</b>  |                        |                        |                        |                |
| Total                                  | 11.3(9.8-12.7)         | 10.9(9.2-12.6)         | 8.1(6.7-9.5)           | 0.002          |
| Sex                                    |                        |                        |                        |                |
| Boys                                   | 10.2(7.8-12.5)         | 9.3(6.8-11.8)          | 8.5(6.7-10.3)          | 0.269          |
| Girls                                  | 12.4(10.8-14)          | 12.5(10.9-14.2)        | 7.7(5.9-9.5)           | <0.001         |
| Age (years)                            |                        |                        |                        |                |
| 6-8                                    | 9.1(6.5-11.7)          | 9(6.4-11.7)            | 7.7(5.5-9.9)           | 0.412          |
| 9-11                                   | 13.6(9.6-17.7)         | 11.3(8.2-14.5)         | 9.4(7.3-11.6)          | 0.069          |
| 12-15                                  | 8.5(6.3-10.8)          | 9(6.6-11.5)            | 6.2(4.4-8)             | 0.105          |
| 16-19                                  | 13.7(10.4-17)          | 13.6(10.5-16.8)        | 9.4(7-11.8)            | 0.035          |
| Race/ethnicity                         |                        |                        |                        |                |
| Non-Hispanic white                     | 10.1(8.2-12)           | 10.7(8.4-13)           | 8.1(5.9-10.3)          | 0.166          |
| Non-Hispanic black                     | 16.1(13.5-18.6)        | 14(12.1-15.9)          | 8.1(6.2-10)            | <0.001         |
| Mexican American                       | 11.6(9.4-13.9)         | 9.9(8.9-11)            | 7.5(5.1-9.9)           | 0.013          |
| <b>HDL cholesterol (&lt; 40 mg/dL)</b> |                        |                        |                        |                |
| Total                                  | 17.3(15-19.5)          | 18.3(17.1-19.4)        | 14.8(13.7-15.9)        | 0.051          |
| Sex                                    |                        |                        |                        |                |
| Boys                                   | 20.8(17.6-24)          | 21.6(19.7-23.5)        | 17.3(15.7-18.8)        | 0.047          |
| Girls                                  | 13.5(10.8-16.3)        | 14.7(12.9-16.6)        | 12.2(10.3-14.2)        | 0.435          |
| Age (years)                            |                        |                        |                        |                |
| 6-8                                    | 14(10.7-17.2)          | 13.3(9.8-16.9)         | 11.1(8.7-13.4)         | 0.147          |
| 9-11                                   | 11.8(8.4-15.1)         | 16.5(12.4-20.5)        | 13.7(11-16.4)          | 0.373          |
| 12-15                                  | 19.7(15.6-23.8)        | 18.1(15.5-20.8)        | 13.9(11.3-16.5)        | 0.017          |
| 16-19                                  | 21.4(17.8-25)          | 23.1(20.7-25.5)        | 18.9(16.2-21.5)        | 0.259          |
| Race/ethnicity                         |                        |                        |                        |                |
| Non-Hispanic white                     | 19.7(16.9-22.5)        | 20.2(18.3-22.2)        | 15.3(13.5-17.1)        | 0.008          |
| Non-Hispanic black                     | 8.8(6.9-10.7)          | 10.2(7.8-12.6)         | 9.1(6.7-11.4)          | 0.863          |
| Mexican American                       | 15.6(12.8-18.4)        | 18.4(16.2-20.5)        | 17.7(15.6-19.8)        | 0.227          |

**eTable 2: (continued)**

| <b>NHDL Cholesterol (≥145 mg/dL)</b>                                              | <b>1988-1994<br/>%(95% CI)</b> | <b>1999-2002<br/>%(95% CI)</b> | <b>2007-2010<br/>%(95% CI)</b> | <b>P<sup>a</sup></b> |
|-----------------------------------------------------------------------------------|--------------------------------|--------------------------------|--------------------------------|----------------------|
| Total                                                                             | 13.6(12.1-15)                  | 14.9(13.1-16.6)                | 10(8.4-11.5)                   | 0.001                |
| Sex                                                                               |                                |                                |                                |                      |
| Boys                                                                              | 12.2(10.2-14.1)                | 14.2(12.1-16.3)                | 11(9-13)                       | 0.424                |
| Girls                                                                             | 15(12.8-17.3)                  | 15.6(13.4-17.8)                | 8.8(6.8-10.8)                  | <0.001               |
| Age (years)                                                                       |                                |                                |                                |                      |
| 6-8                                                                               | 10.5(7.6-13.5)                 | 11.8(8.6-15)                   | 7.3(5.3-9.3)                   | 0.067                |
| 9-11                                                                              | 15.6(11.7-19.5)                | 15.6(12.1-19.2)                | 11.1(8.9-13.3)                 | 0.047                |
| 12-15                                                                             | 11.1(8.4-13.8)                 | 13.1(11.1-15.1)                | 8.2(5.6-10.9)                  | 0.124                |
| 16-19                                                                             | 16.6(13.3-19.8)                | 18.2(15.1-21.3)                | 12.6(10.3-14.8)                | 0.042                |
| Race/ethnicity                                                                    |                                |                                |                                |                      |
| Non-Hispanic white                                                                | 13.9(12.1-15.7)                | 15.9(13.5-18.2)                | 10.8(8.3-13.3)                 | 0.046                |
| Non-Hispanic black                                                                | 14.1(12-16.2)                  | 14.6(12.2-17)                  | 7.5(6.1-8.9)                   | <0.001               |
| Mexican American                                                                  | 13(10.4-15.6)                  | 12.6(11.2-14)                  | 9.5(7.6-11.4)                  | 0.031                |
| <b>Either HDL cholesterol (&lt;40 mg/dL)<br/>or NHDL cholesterol (≥145 mg/dL)</b> |                                |                                |                                |                      |
| Total                                                                             | 27.2(24.6-29.7)                | 28.4(26.9-30)                  | 22(20.3-23.6)                  | 0.001                |
| Sex                                                                               |                                |                                |                                |                      |
| Boys                                                                              | 28.9(25.8-31.9)                | 30(28.1-32)                    | 24.7(22.7-26.6)                | 0.022                |
| Girls                                                                             | 25.4(22-28.7)                  | 26.7(24.3-29.1)                | 19(16.6-21.5)                  | 0.003                |
| Age (years)                                                                       |                                |                                |                                |                      |
| 6-8                                                                               | 21.4(17.3-25.4)                | 23.8(19-28.6)                  | 16.8(14-19.7)                  | 0.068                |
| 9-11                                                                              | 24(19.3-28.7)                  | 26.8(22.9-30.7)                | 22.2(19.1-25.3)                | 0.522                |
| 12-15                                                                             | 27.8(22.6-33)                  | 26.6(24-29.3)                  | 19.6(16-23.3)                  | 0.011                |
| 16-19                                                                             | 33.1(28.9-37.3)                | 34.5(31.9-37.1)                | 27.3(24.4-30.2)                | 0.022                |
| Race/ethnicity                                                                    |                                |                                |                                |                      |
| Non-Hispanic white                                                                | 29.1(26.1-32.2)                | 30.4(27.6-33.3)                | 23.2(20.2-26.1)                | 0.005                |
| Non-Hispanic black                                                                | 21(18.6-23.4)                  | 22(18.8-25.2)                  | 15.2(12.9-17.6)                | 0.001                |
| Mexican American                                                                  | 24.9(21.1-28.7)                | 27.4(24.9-30)                  | 23.8(20.5-27.1)                | 0.651                |

Source: National Health and Nutrition Examination Surveys

Abbreviations: HDL- high density lipoprotein; NHDL- non-high density lipoprotein; CI- confidence interval

<sup>a</sup> P-value for linear trend between 1988-1994 and 2007-2010

**eTable 3:** Prevalence Over Time in Adverse Lipid Concentration by Sex, Age, Race/Ethnicity, Among Adolescents, 12-19 Years, US, 1988-2010

|                                                 | 1988-1994<br>%  | 1999-2002<br>%  | 2007-2010<br>%  | P <sup>a</sup> |
|-------------------------------------------------|-----------------|-----------------|-----------------|----------------|
| <b>LDL cholesterol<sup>b</sup> (≥130 mg/dL)</b> |                 |                 |                 |                |
| Total                                           | 11.9(8.3-15.5)  | 9.2(7.1-11.4)   | 7.4(5.4-9.4)    | 0.030          |
| Sex                                             |                 |                 |                 |                |
| Boys                                            | 9.4(4.1-14.7)   | 9.8(6.3-13.2)   | 7.3(4.5-10.1)   | 0.489          |
| Girls                                           | 14.4(10.1-18.6) | 8.7(6.8-10.6)   | 7.6(5.3-9.9)    | 0.005          |
| Age (years)                                     |                 |                 |                 |                |
| 12-15                                           | 7.5(5-10)       | 7.8(5.5-10.1)   | 5.6(3.2-8.1)    | 0.287          |
| 16-19                                           | 15.7(10.2-21.2) | 10.7(7.4-13.9)  | 9.3(6.4-12.1)   | 0.037          |
| Race/ethnicity                                  |                 |                 |                 |                |
| Non-Hispanic White                              | 13.7(8.5-18.9)  | 8.8(6.1-11.6)   | 7.8(4.7-11)     | 0.05           |
| Non-Hispanic Black                              | 12.6(8.7-16.4)  | 10.7(7.9-13.6)  | 9.2(5-13.4)     | 0.214          |
| Mexican American                                | 6.8(3.6-9.9)    | 7.8(5.1-10.6)   | 5.3(2.3-8.4)    | 0.495          |
| <b>Triglycerides (≥130 mg/dL)</b>               |                 |                 |                 |                |
| Total                                           | 17.3(13.6-21)   | 16.1(13-19.2)   | 12.4(10.1-14.8) | 0.027          |
| Sex                                             |                 |                 |                 |                |
| Boys                                            | 16.1(8.9-23.3)  | 17.5(13.2-21.9) | 13.3(9.3-17.4)  | 0.506          |
| Girls                                           | 18.5(12.6-24.3) | 14.7(9.8-19.6)  | 11.5(7-16.1)    | 0.061          |
| Age (years)                                     |                 |                 |                 |                |
| 12-15                                           | 15.7(9.9-21.6)  | 13.8(10.5-17.1) | 10(7.6-12.4)    | 0.068          |
| 16-19                                           | 18.6(12.4-24.9) | 18.4(13.5-23.3) | 14.9(11.3-18.5) | 0.302          |
| Race/ethnicity                                  |                 |                 |                 |                |
| Non-Hispanic White                              | 18.9(13.5-24.2) | 18(13.4-22.6)   | 13.7(10.6-16.9) | 0.093          |
| Non-Hispanic Black                              | 4.8(2.4-7.2)    | 7.3(4.5-10.1)   | 3.7(1.4-6)      | 0.488          |
| Mexican American                                | 17.1(12.3-22)   | 16.5(13.7-19.4) | 18(13.4-22.6)   | 0.779          |

Source: National Health and Nutrition Examination Surveys

Abbreviation: LDL- low density lipoprotein; LL- lower limit for the 95% confidence interval; UL- upper limit for the 95% confidence interval

<sup>a</sup> P-value for linear trend between 1988-1994 and 2007-2010

<sup>b</sup> Low density lipoprotein cholesterol is calculated by the Friedewald Equation as follows: LDL=Serum total cholesterol-HDL-serum triglyceride/5. This equation is valid only if serum triglyceride≤400 mg/dL.

**eTable 4:** Linear Regression Analyses of Serum Lipid Concentrations With Adjustment for Age, Race/Ethnicity, and Weight Status, US, 6-19 Years , 1988-2010

|                          | Total cholesterol<br>Beta-coefficient<br>(95% CI) |                      | HDL cholesterol<br>Beta-coefficient<br>(95% CI) |                    | Non-HDL<br>cholesterol <sup>a</sup><br>Beta-coefficient<br>(95% CI) |                       | LDL cholesterol<br><sup>b,c</sup><br>Beta-coefficient<br>(95% CI) |                       | Log triglyceride <sup>c</sup><br>Beta-coefficient<br>(95% CI) |                        |
|--------------------------|---------------------------------------------------|----------------------|-------------------------------------------------|--------------------|---------------------------------------------------------------------|-----------------------|-------------------------------------------------------------------|-----------------------|---------------------------------------------------------------|------------------------|
|                          | Boys                                              | Girls                | Boys                                            | Girls              | Boys                                                                | Girls                 | Boys                                                              | Girls                 | Boys                                                          | Girls                  |
| <b>Total<sup>d</sup></b> |                                                   |                      |                                                 |                    |                                                                     |                       |                                                                   |                       |                                                               |                        |
| 1988-1994                | 0.0 (ref)                                         | 0.0 (ref)            | 0.0 (ref)                                       | 0.0 (ref)          | 0.0 (ref)                                                           | 0.0 (ref)             | 0.0 (ref)                                                         | 0.0 (ref)             | 0.0 (ref)                                                     | 0.0 (ref)              |
| 1999-2002                | -1.2<br>(-4.1, 1.8)                               | -1.0<br>(-3.2, 1.3)  | -0.6<br>(-1.6, 0.4)                             | 0.0<br>(-0.9, 0.9) | -0.6<br>(-3.2, 2.1)                                                 | -1.0<br>(-3.3, 1.3)   | 3.7<br>(-1.4, 8.8)                                                | -4.7<br>(-9.8, 0.5)   | 0.00<br>(-0.07, 0.08)                                         | -0.05<br>(-0.13, 0.02) |
| 2007-2010                | -5.3<br>(-8.1, -2.6)                              | -7.3<br>(-9.9, -4.6) | 2.7<br>(1.6, 3.8)                               | 2.1<br>(1.1, 3.2)  | -8.0<br>(-10.7, -5.3)                                               | -9.4<br>(-12.1, -6.7) | -3.2<br>(-8.6, 2.3)                                               | -9.0<br>(-14.1, -3.8) | -0.10<br>(-0.18, 0.01)                                        | -0.18<br>(-0.28, 0.09) |

Source: National Health and Nutrition Examination Surveys

<sup>a</sup> Non-HDL cholesterol=Serum total cholesterol-HDL cholesterol.

<sup>b</sup> Low density lipoprotein cholesterol is calculated by the Friedewald Equation as follows: LDL=Serum total cholesterol-HDL-serum triglyceride/5. This equation is valid only if serum triglyceride<=400 mg/dL.

<sup>c</sup> Analyses for LDL cholesterol and triglyceride include only youth 12-19 years

<sup>d</sup> Adjusted for age, race/ethnicity, and weight status
